# Supplementary material for: Artificial antigen-presenting cell system reveals CD28’s role in modulating T cell functions during human immunodeficiency virus infection
Source: PubMed Central journal article supplement — iScience. 2024 Sep 13;27(10):110947. doi: 10.1016/j.isci.2024.110947 (PMC11460474; doi:10.1016/j.isci.2024.110947), 2024-09-13
Supplement: mmc1.pdf [file mmc1.pdf]

**Supplemental information**

**Artificial antigen-presenting cell system reveals CD28's role in modulating T cell functions during human immunodeficiency virus infection**

**Tayma Shaaban Kabakibo, Edwige Arnold, Kartika Padhan, Aurée Lemieux, Gloria Gabrielle Ortega-Delgado, Jean-Pierre Routy, Naglaa Shoukry, Mathieu Dubé, and Daniel E. Kaufmann**

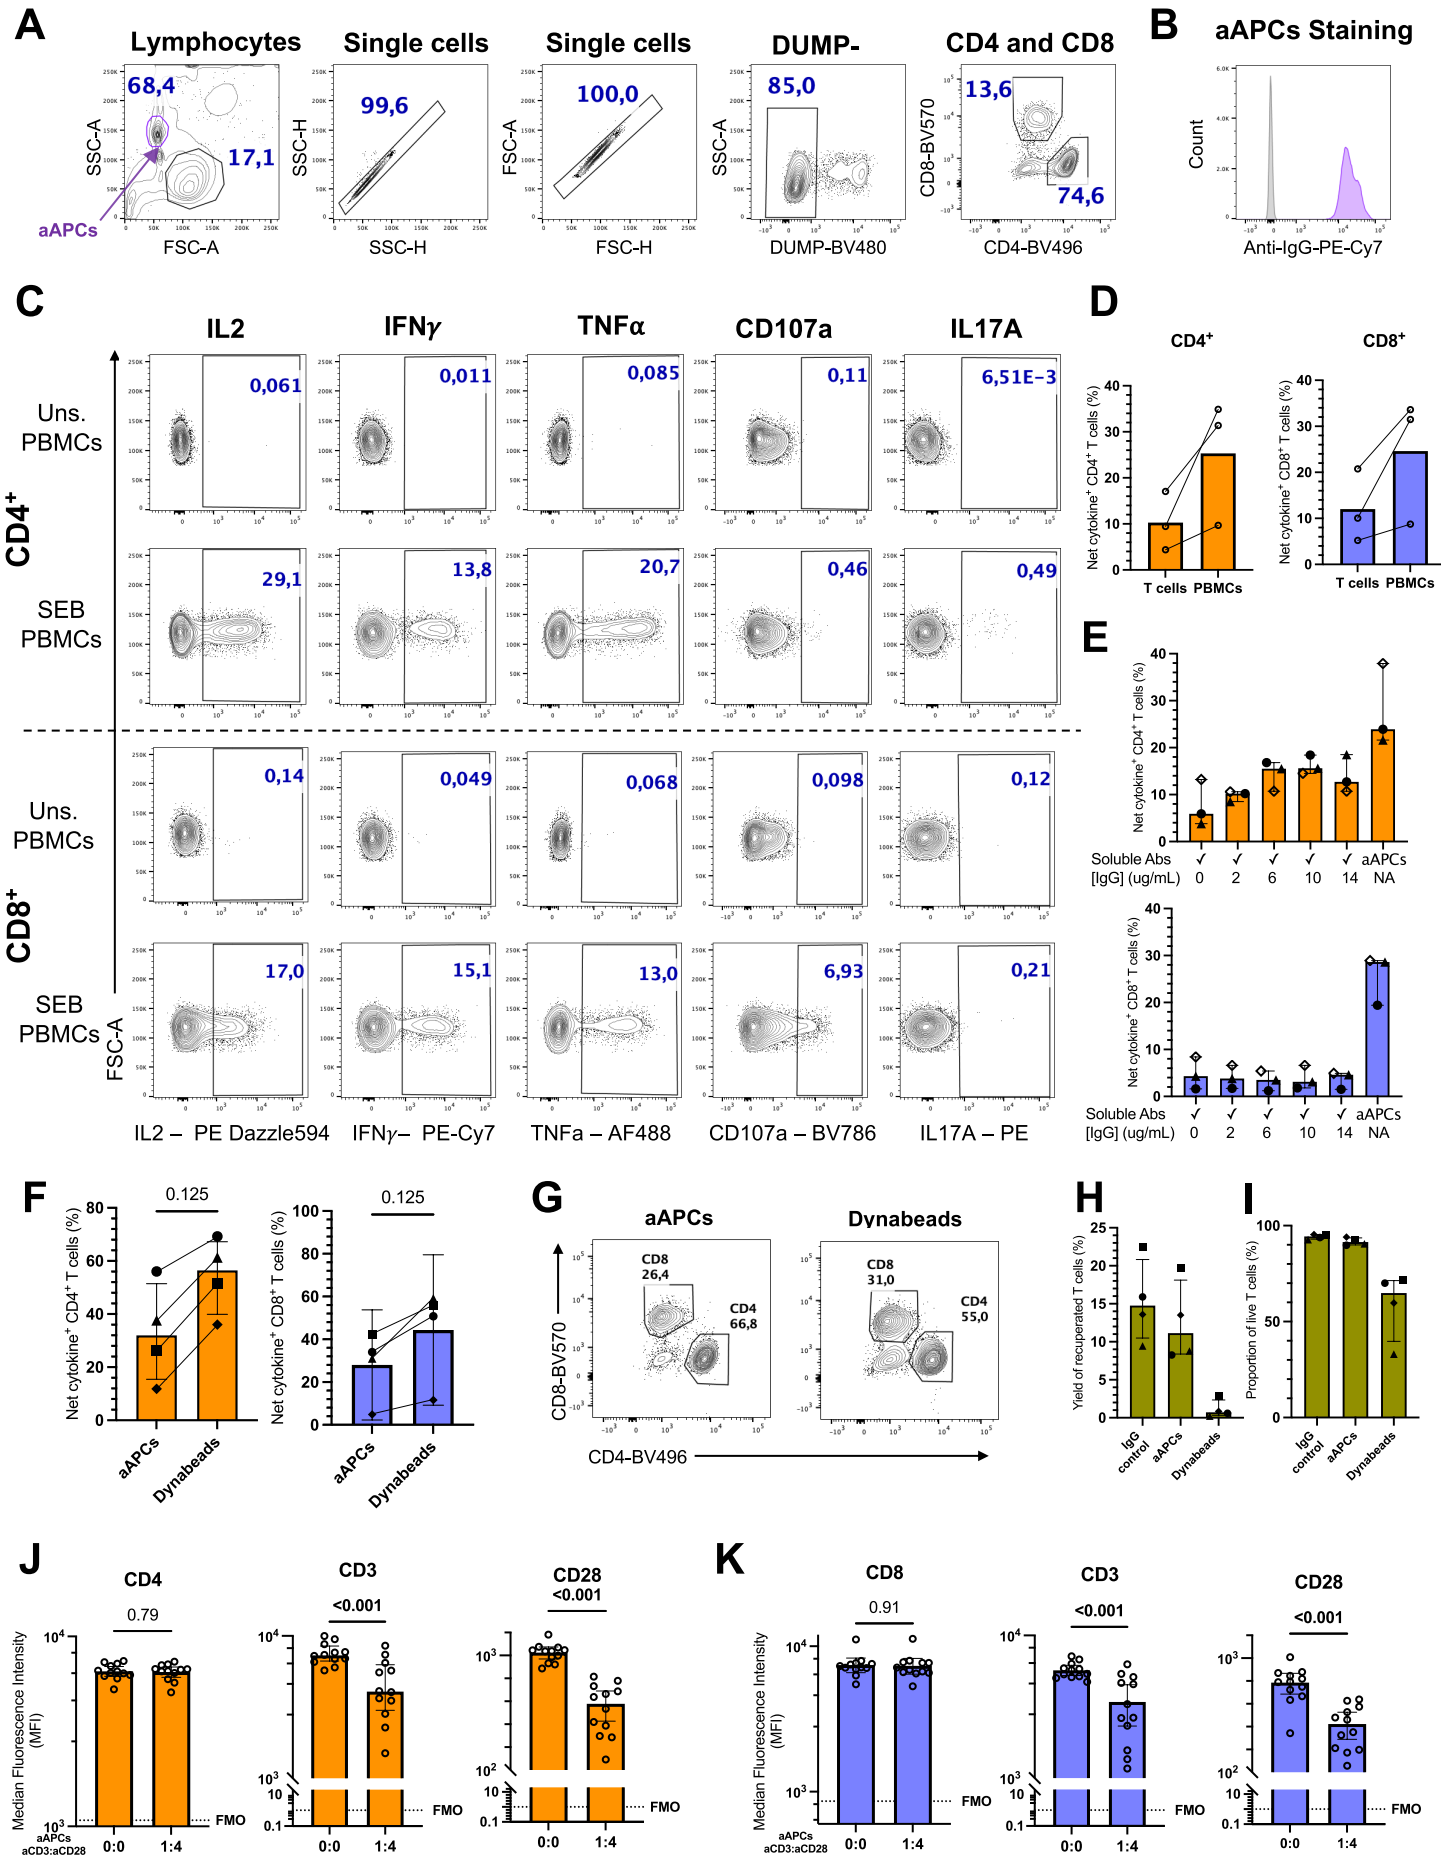

**Figure S1**

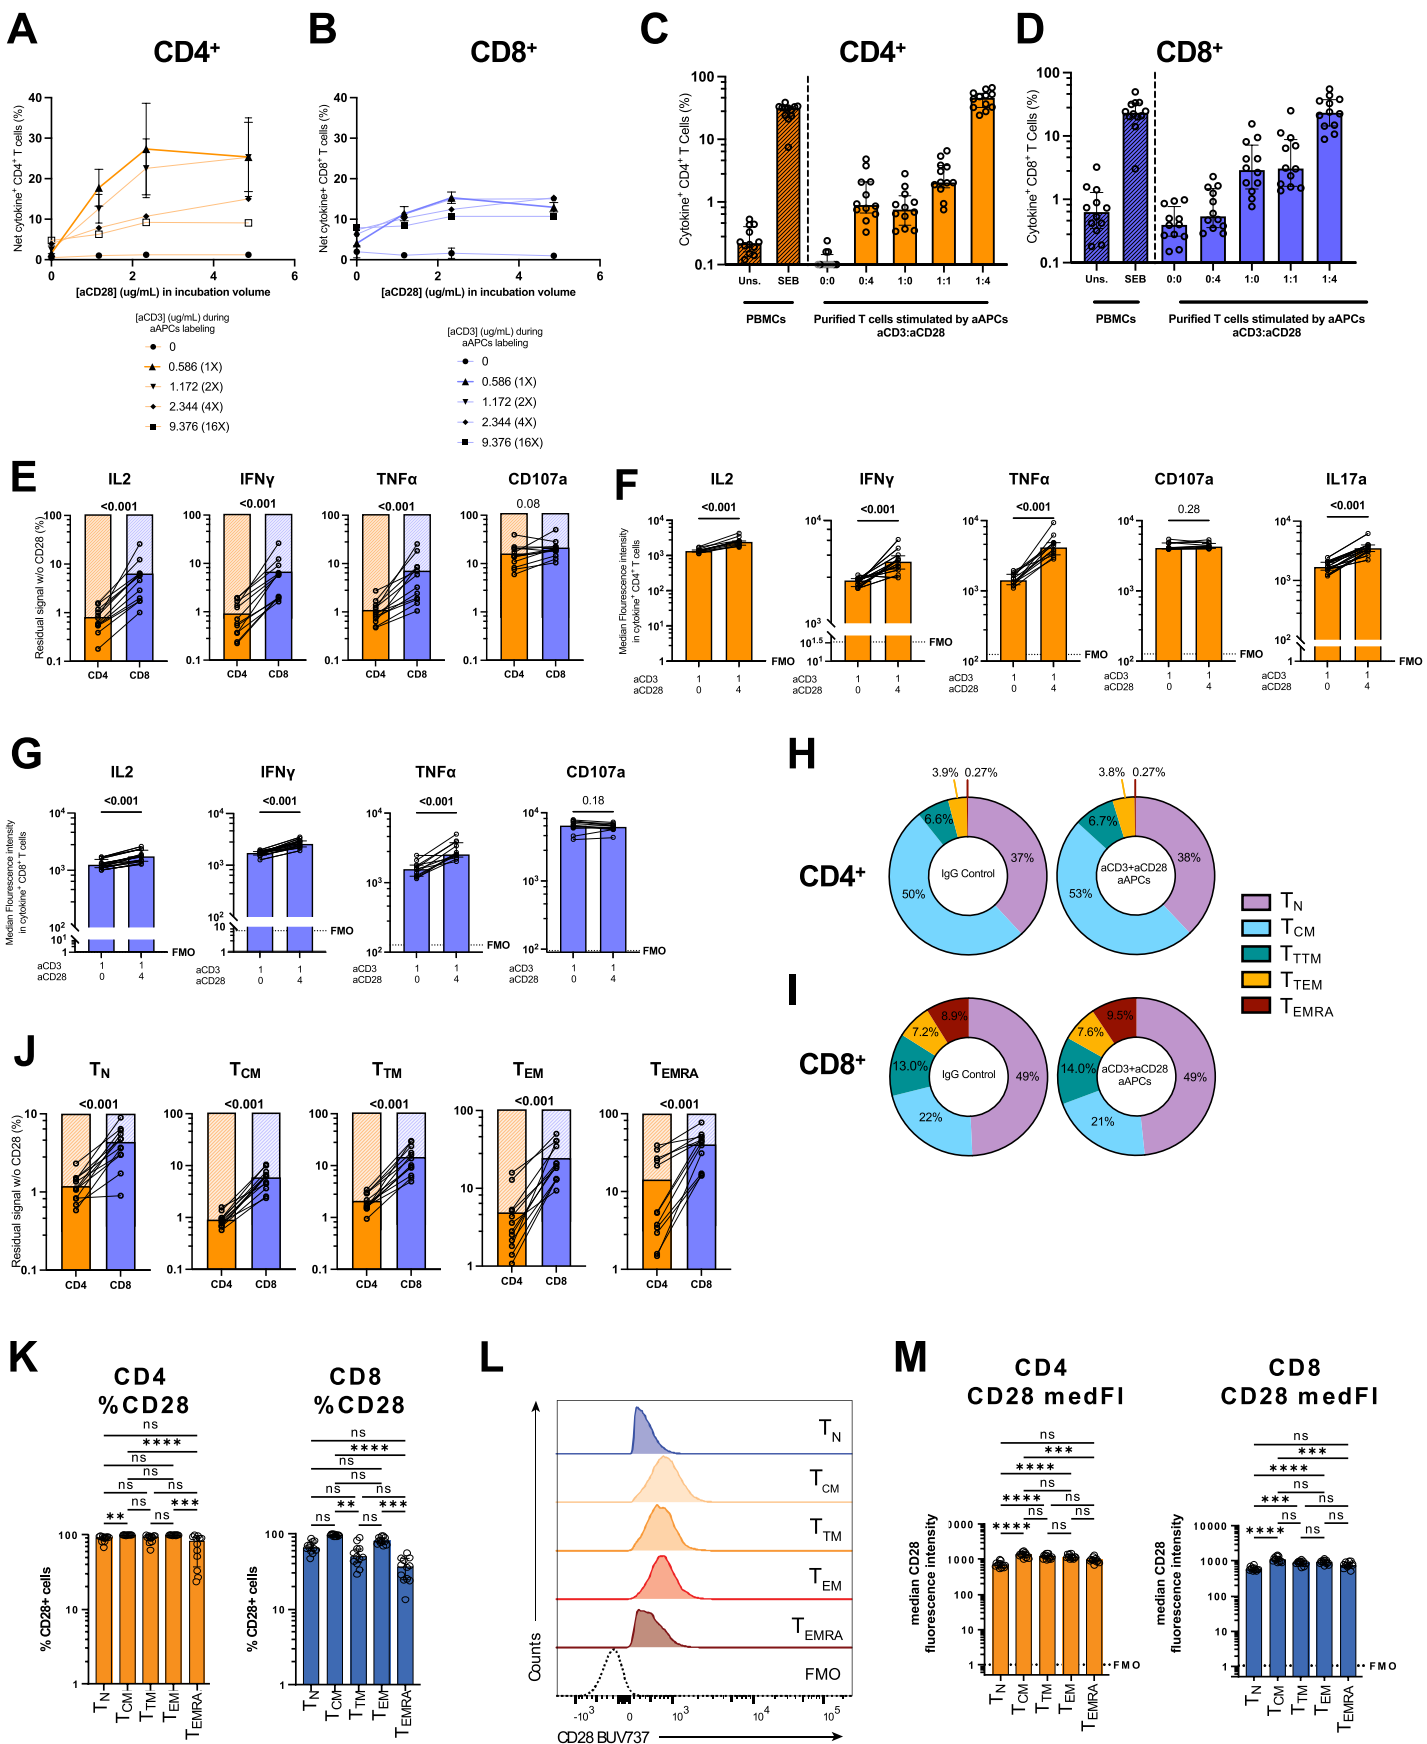

**Figure S2**

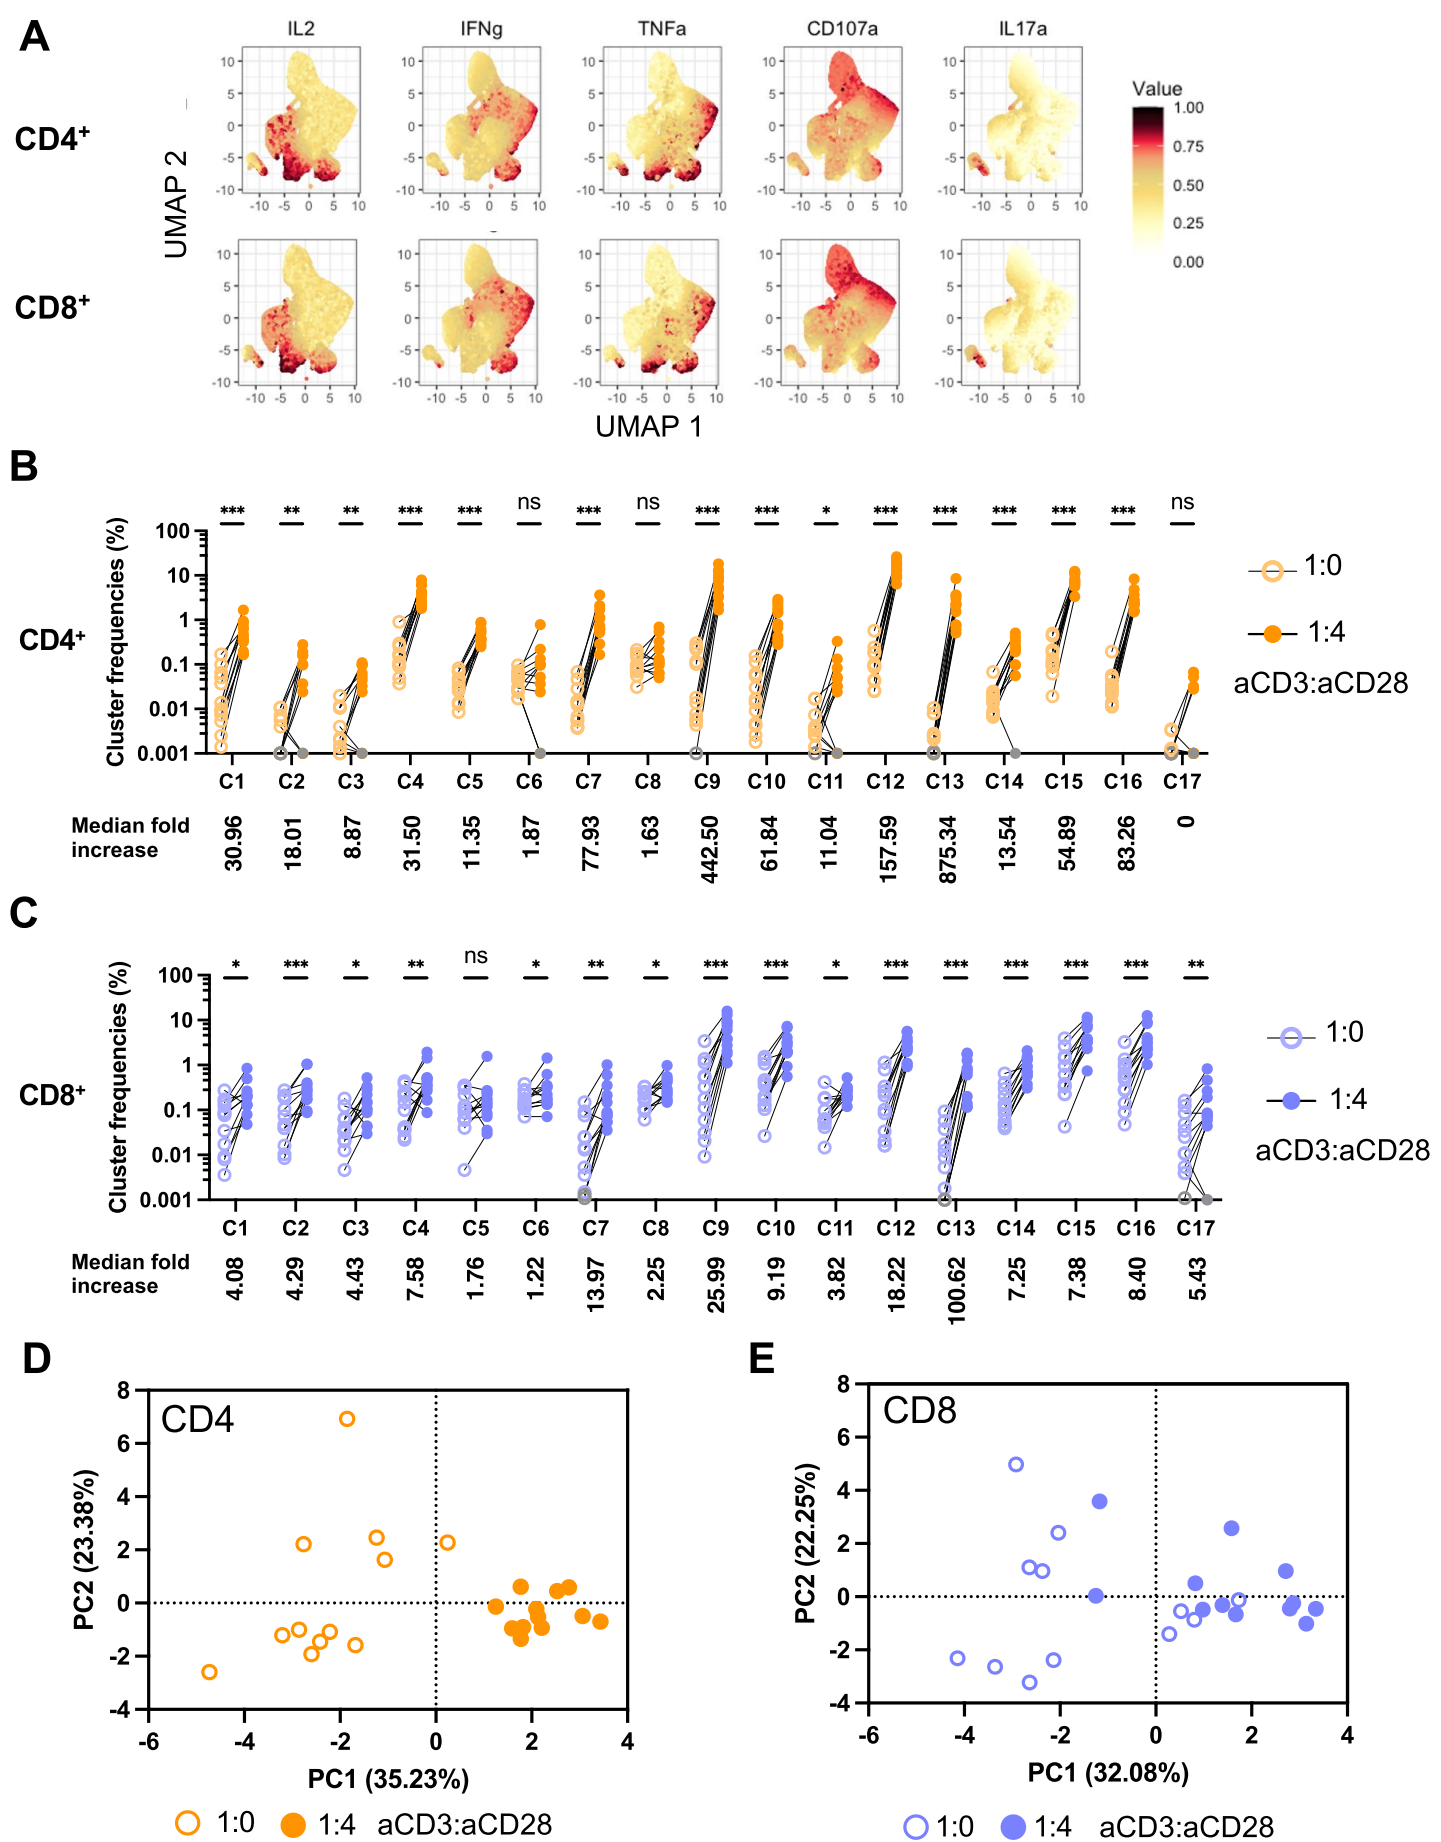

**Figure S3**

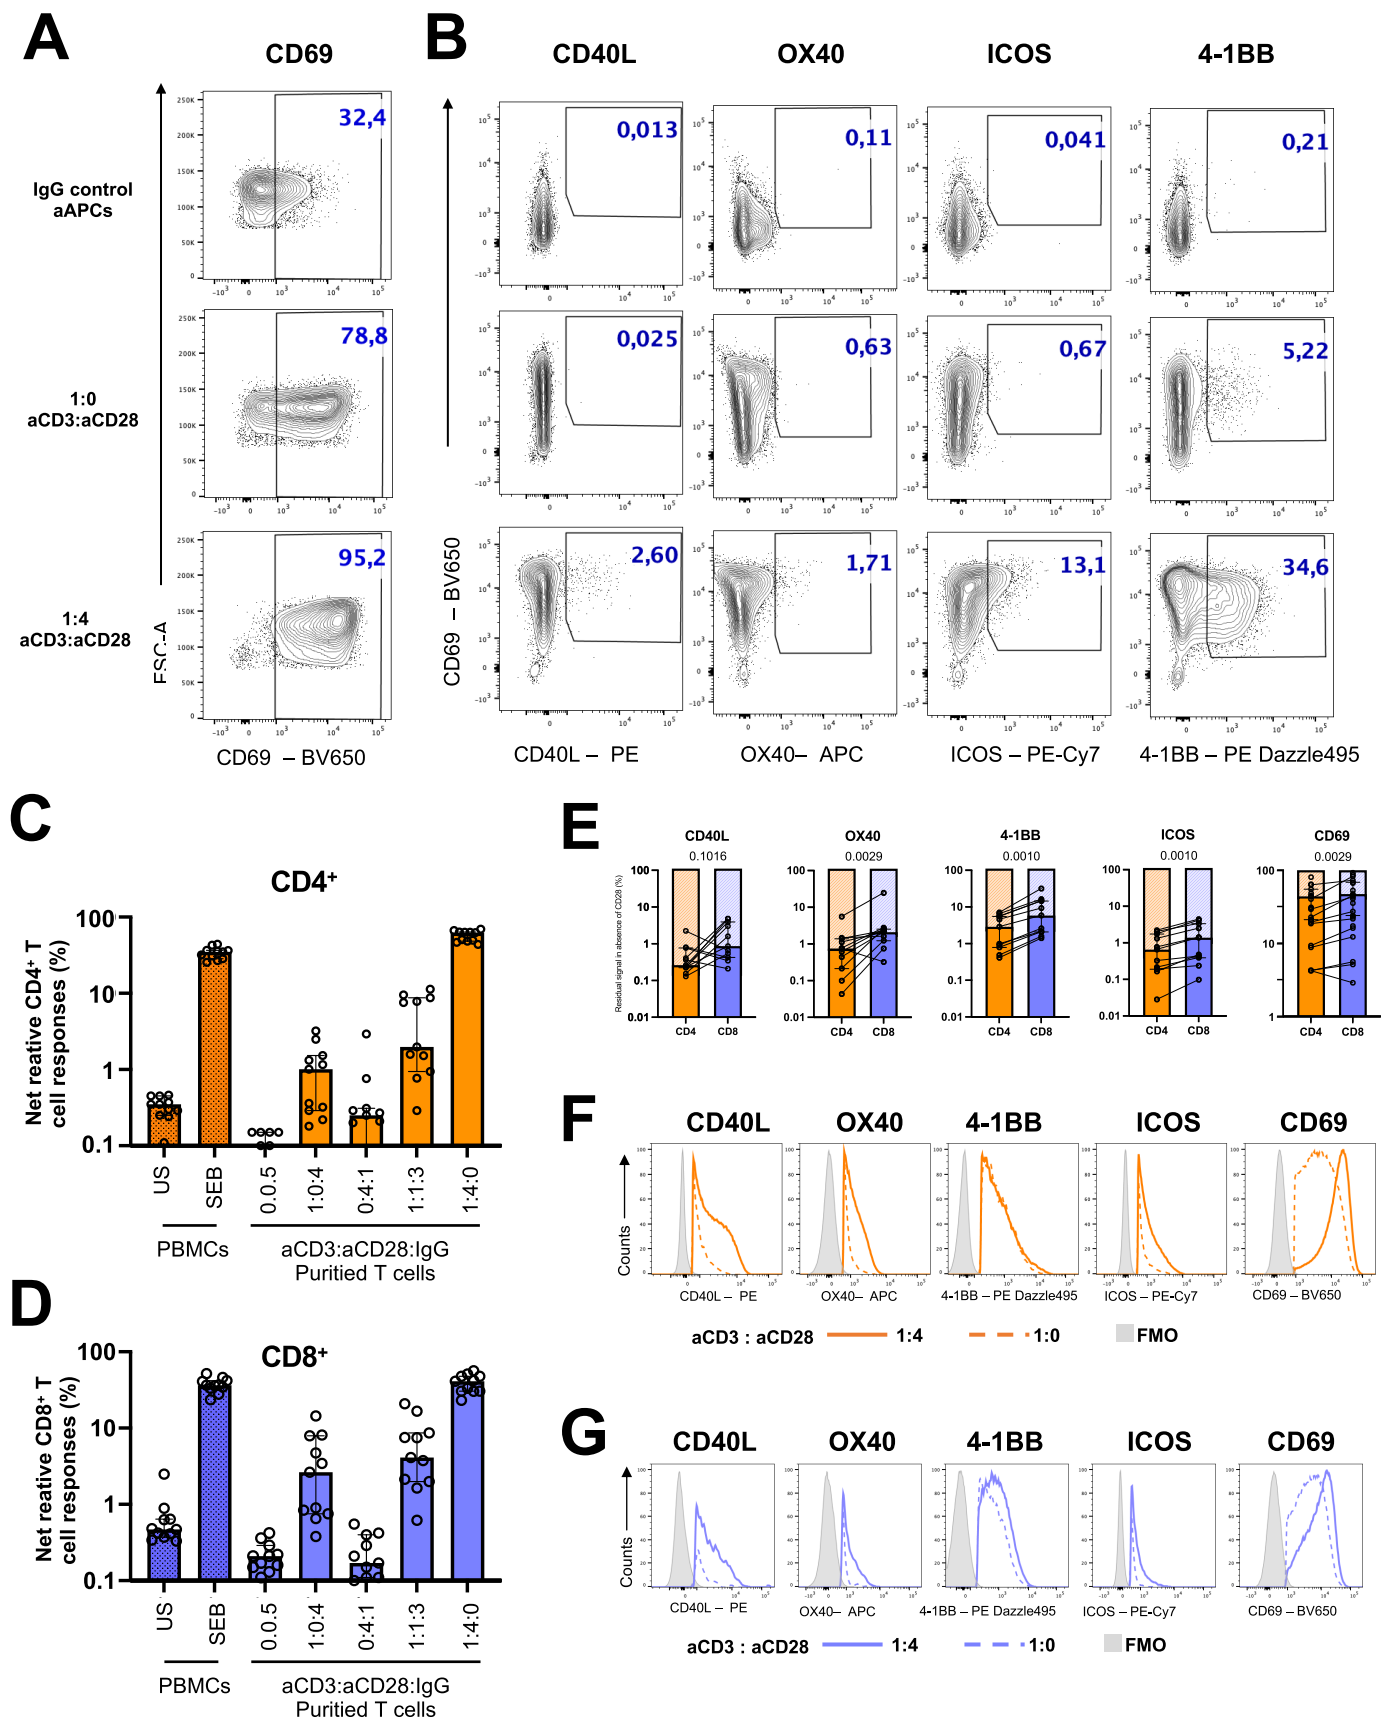

**Figure S4**

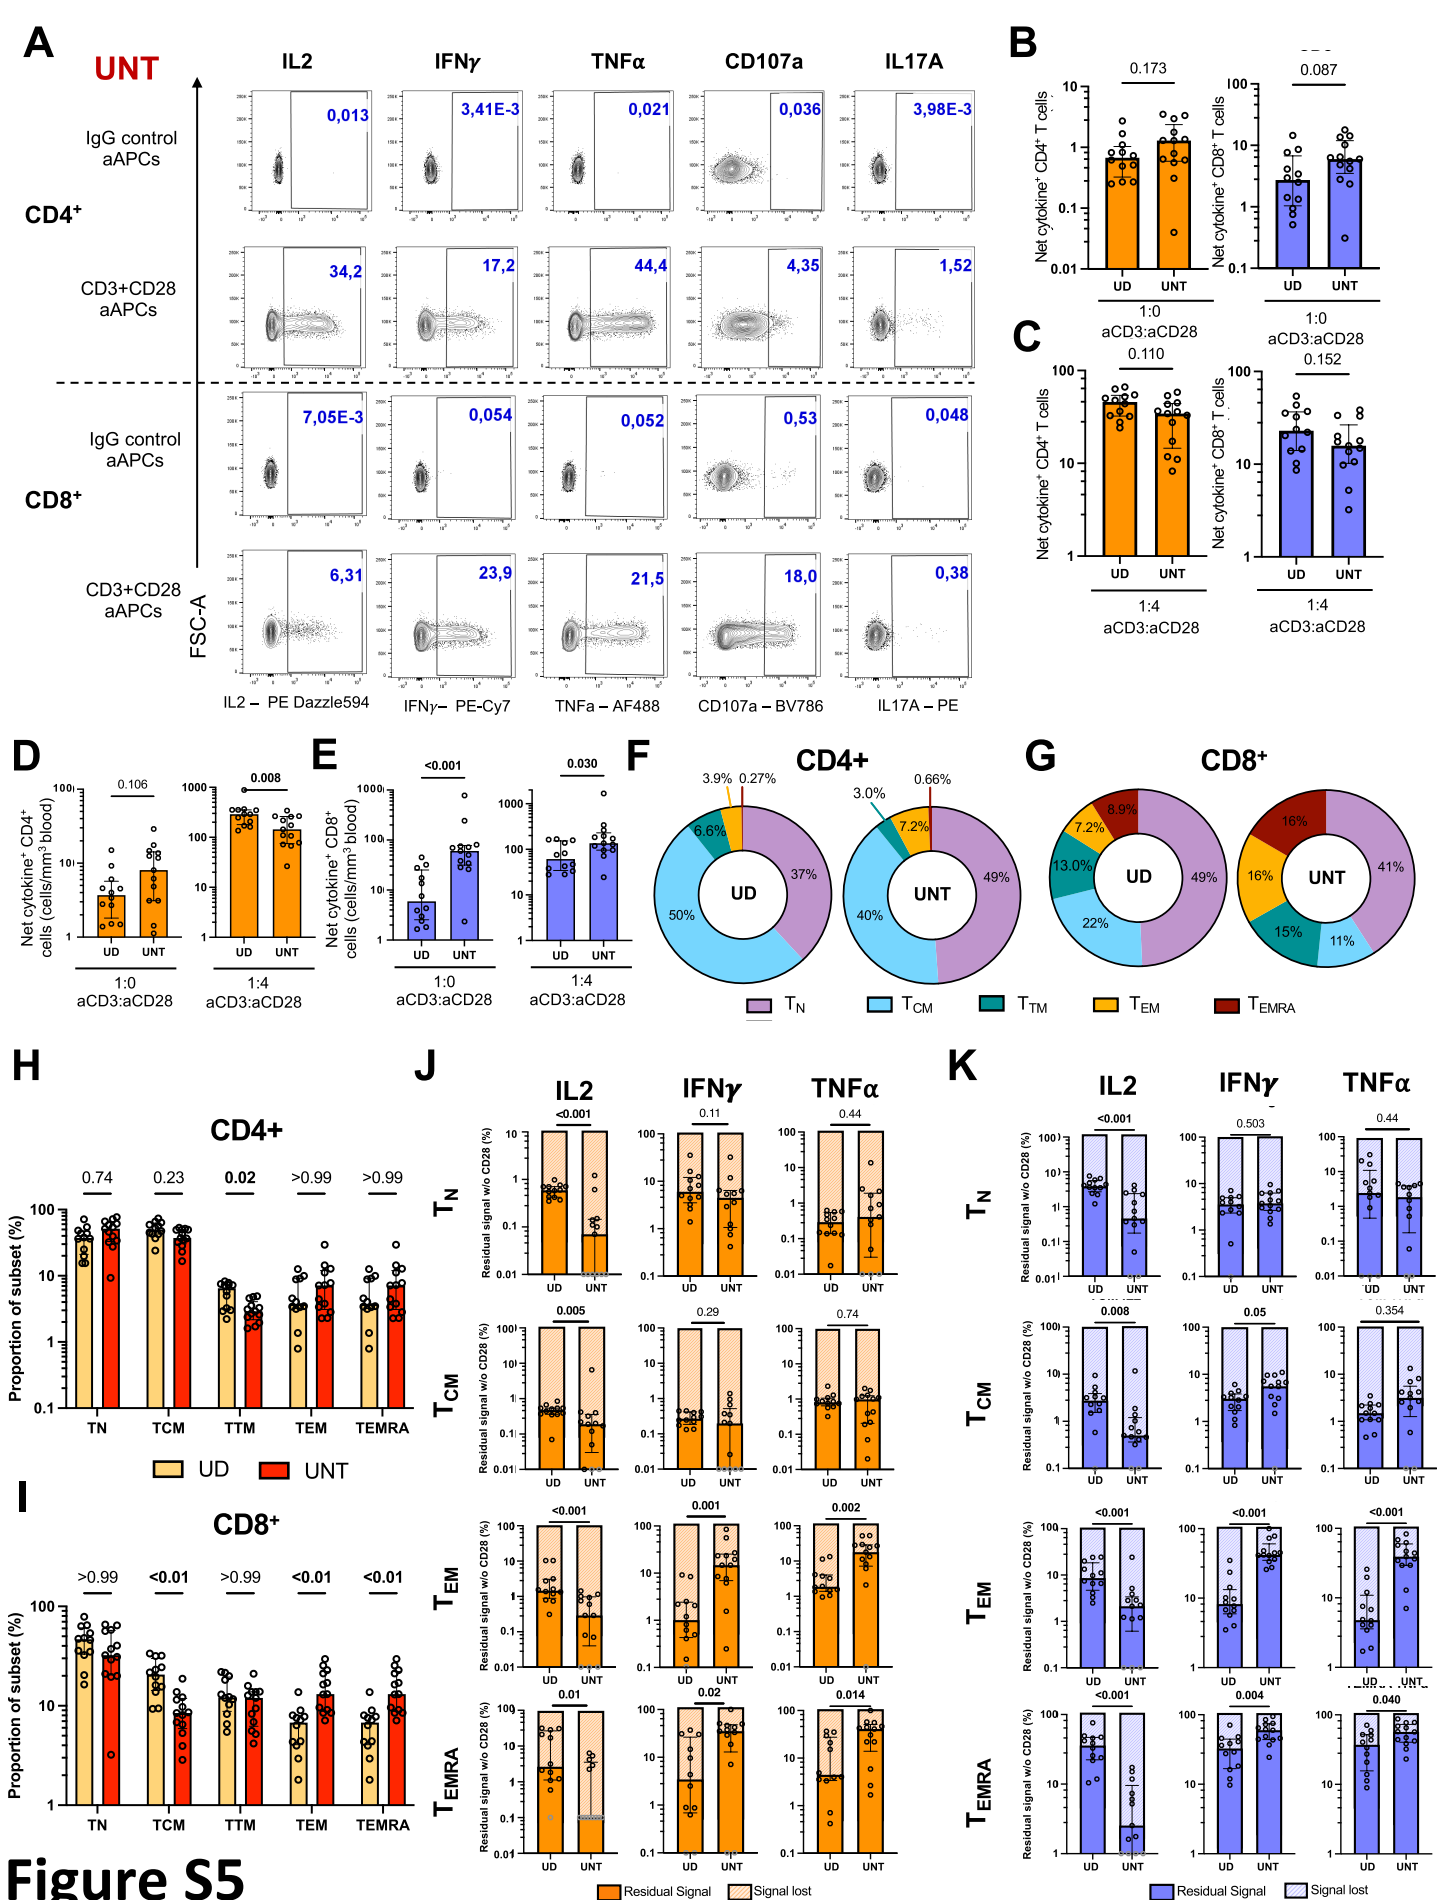

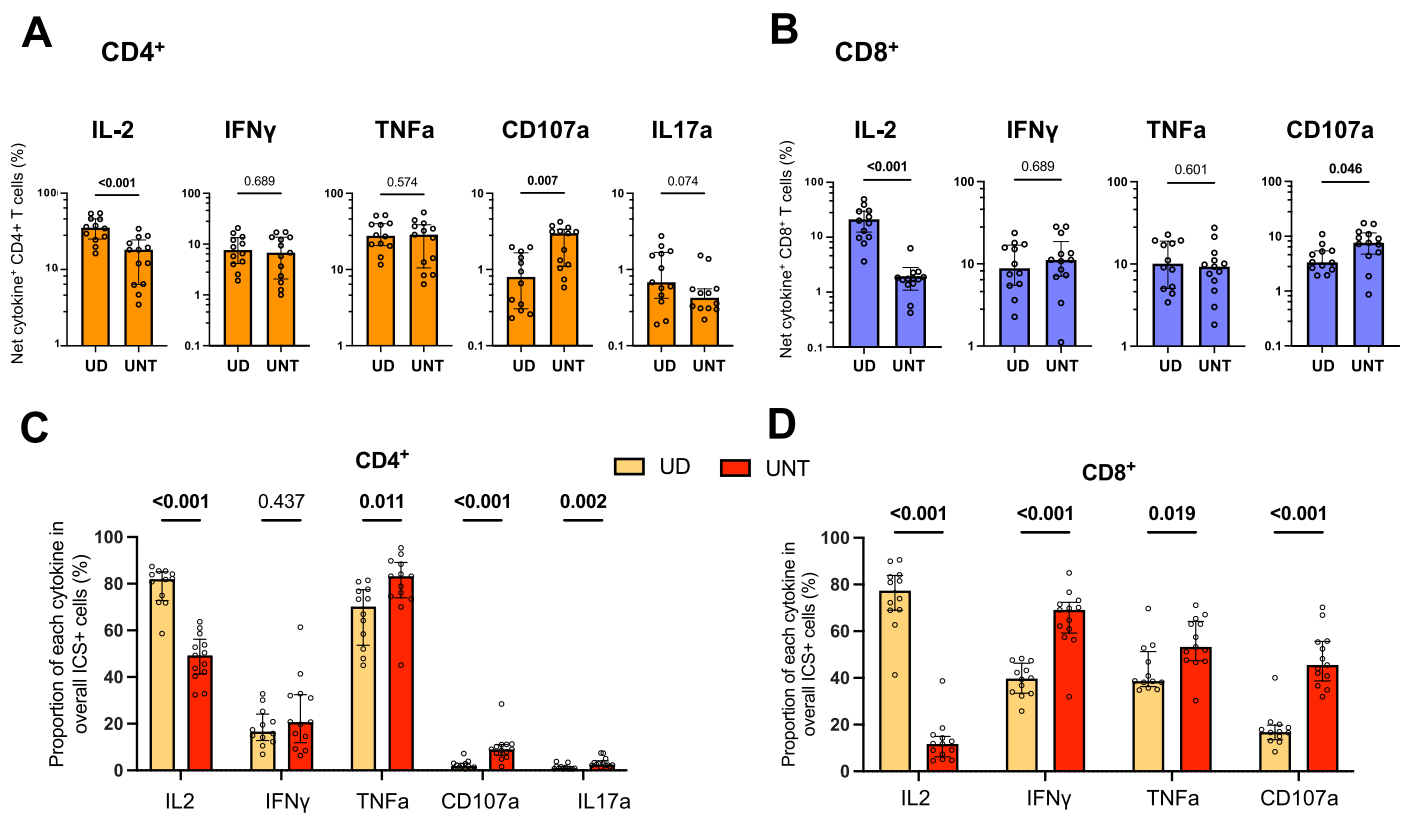

**Figure S6**

# A ART

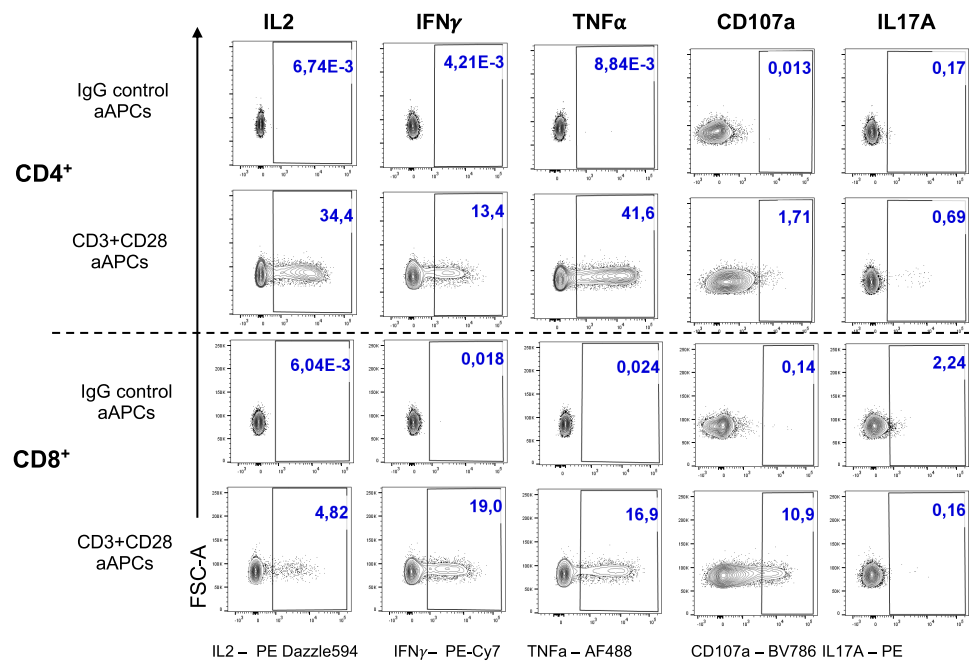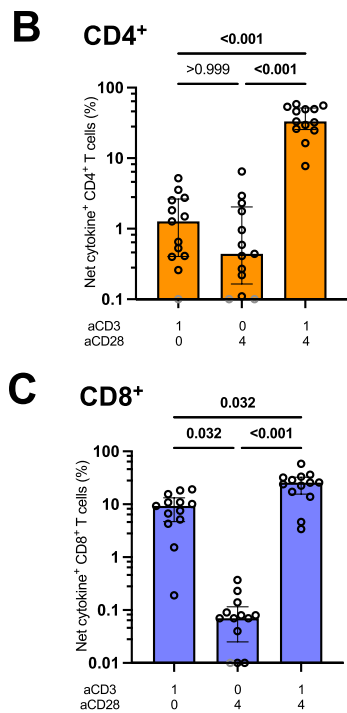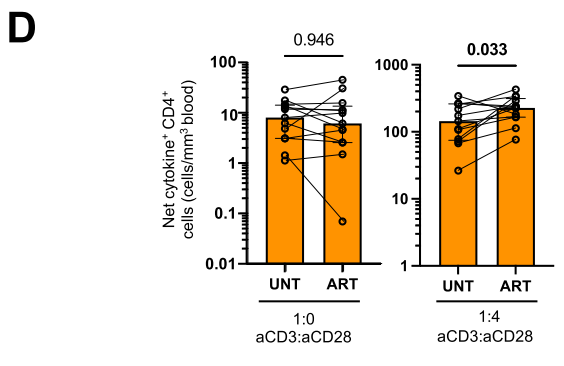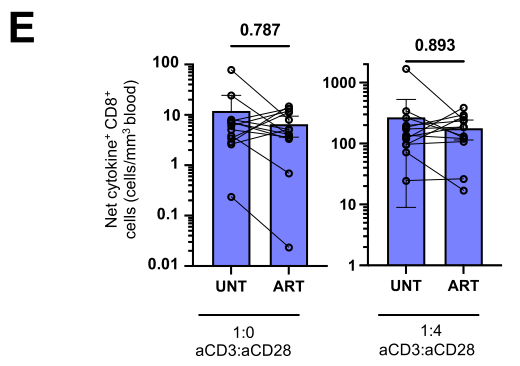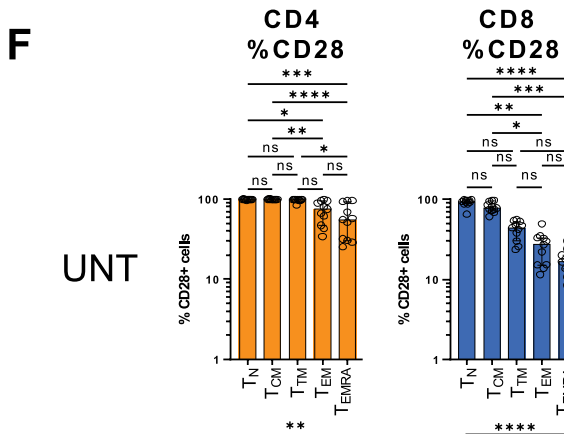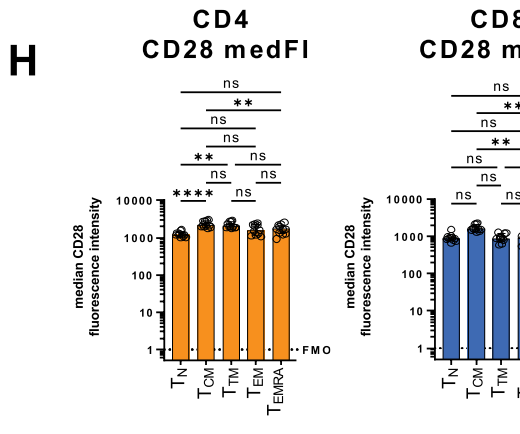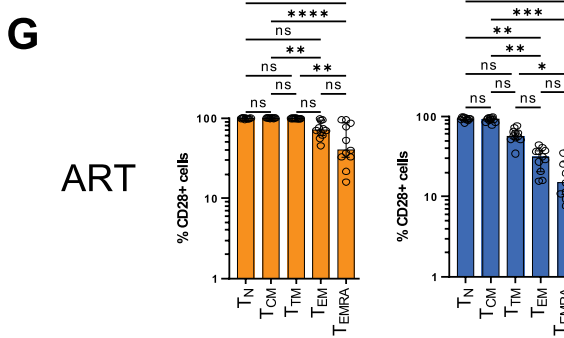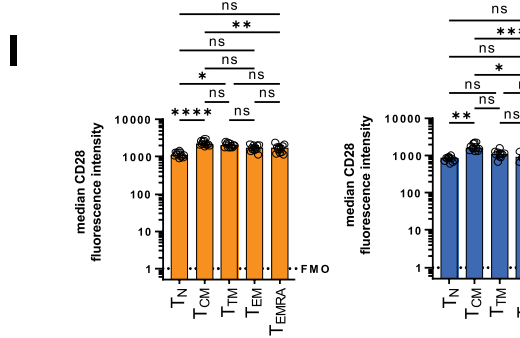

Figure S7



## SUPPLEMENTAL FIGURE LEGENDS

**Figure S1. T cell activation by aAPCs. Related to Figure 1.** 15h stimulation of purified T cells from UD participants with aAPCs (aCD3:aCD28:IgG 1:4:0), unless otherwise indicated. **(A)** Gating strategy for identifying CD4<sup>+</sup> and CD8<sup>+</sup> T cells. **(B)** Staining of aCD3 and aCD28 antibodies on aAPCs with anti-IgG. **(C)** Representative flow cytometry plots showing cytokine expression in CD4<sup>+</sup> and CD8<sup>+</sup> T cells following 15h of SEB stimulation in total PBMCs. **(D)** Background-subtracted net cytokine<sup>+</sup> CD4<sup>+</sup> or CD8<sup>+</sup> T cells after 15h of SEB stimulation in total PBMCs or purified T cells. Wilcoxon test is shown. **(E)** Background-subtracted net ICS<sup>+</sup> CD4<sup>+</sup> and CD8<sup>+</sup> T cells responses to aAPCs aCD3:aCD28:IgG at a ratio of 1:4:0 or with equivalent amounts of soluble aCD3 and aCD28 crosslinked with different anti-IgG concentrations in purified T cells, N=3. **(F)** Background-subtracted net cytokine<sup>+</sup> CD4<sup>+</sup> or CD8<sup>+</sup> T cells, when activated for 15h with aCD3+aCD28 aAPCs (cells-to-beads ratio of 1-4) or with Dynabeads (cells-to-beads ratio of 1-1), N=3, Wilcoxon test is shown. **(G)** Dot plots of CD4<sup>+</sup> and CD8<sup>+</sup> T cell populations after stimulation with aAPCs (aCD3+aCD28) or Dynabeads. **(H)** The proportion of live T cells (DUMP<sup>-</sup>) within the lymphocyte population. **(I)** Live T cells recuperation yields from the initial 2 million purified T cells (number of (DUMP<sup>-</sup>) T cells/ number of input T cells (2 million)). **(J-K)** Median fluorescence intensity (MFI) of different surface markers' expression on CD4<sup>+</sup> T cells **(J)** or CD8<sup>+</sup> T cells **(K)** after stimulation with different conditions of aAPCs for 15h. N=12, Wilcoxon test results are shown. In **E,F, H-K**, error bars represent interquartile.

**Figure S2. CD28 co-stimulation enhances effector functions in CD4<sup>+</sup> and CD8<sup>+</sup> T cells to varying degrees.**

**Related to Figure 2.** Univariate analyses of cytokine expression in CD4<sup>+</sup> and CD8<sup>+</sup> T cells after 15h of aAPCs stimulation of purified T cells from UD participants. Unless specified otherwise, the 1:4:0 (aCD3:aCD28:IgG; aCD3 aCD28 aAPCs) stimulation is presented. N=2, except for [aCD3]=2.344 and 9.376 µg/mL, N=1. **(C-D)** Raw cytokine<sup>+</sup> CD4<sup>+</sup> **(C)** or CD8<sup>+</sup> **(D)** T cell responses to SEB stimulation in total PBMCs (left) and to aAPCs stimulation with different aCD3:aCD28 ratios in purified T cells (right). Uns. Unstimulated. **(E)** Percentage of residual cytokine<sup>+</sup> signal when activating with aCD3 aAPCs compared to aCD3+aCD28 in CD4<sup>+</sup> vs CD8<sup>+</sup> T cells. **(F-G)** Median fluorescence intensity (MFI) of each gated cytokine<sup>+</sup> in CD4<sup>+</sup> **(F)** or CD8<sup>+</sup> **(G)** T cells when stimulated with aCD3 aAPCs compared to aCD3+aCD28 aAPCs. **(H-I)** Median proportions of each memory subset in CD4<sup>+</sup> **(H)** or CD8<sup>+</sup> **(I)** T cells. **(J)** Percentage of residual cytokine<sup>+</sup> signal when activating with aCD3 aAPCs compared to aCD3+aCD28 in different CD4<sup>+</sup> vs CD8<sup>+</sup> T cells memory subsets. **(K)** Proportion of CD28-expressing cells in memory subsets. **(L)** Representative overlay depicting the level of CD28 expression on indicated memory CD4<sup>+</sup> T cell subsets. The FMO is presented as a negative control. **(M)** Median fluorescence intensity of CD28 expression on CD28<sup>+</sup> naïve and indicated memory subsets in unstimulated CD4<sup>+</sup> (orange) and CD8<sup>+</sup> (blue) T cells. **(C-M)** N=12. In **(E-G,J)**, Wilcoxon test was used for paired comparisons. **(K,M)** Freedman test are shown. Ns: non-significant,  $p > 0.05$ . In **(C-D)**, error bars represent interquartile range

**Figure S3. High responsiveness of IL-2 to CD28 co-stimulation shapes effector functions. Related to Figure 3.** Multivariate analyses of cytokine expression in CD4<sup>+</sup> and CD8<sup>+</sup> T cells after 15h of aAPCs stimulation of purified T cells from UD participants. The 1:4:0 (aCD3:aCD28:IgG; aCD3 aCD28 aAPCs) and 1:0:4 (aCD3:aCD28:IgG; aCD3 aAPCs) are herein qualitatively compared. Cytokine<sup>+</sup> CD4 and CD8 T cells are identified by Boolean ORgate gating, downsampled to 1000 cell per participant per condition, concatenated then analyzed as follows. **(A)** Heat map overlaid on the cytokine<sup>+</sup> UMAP showing the expression gradient for each cytokine. **(B-C)** Frequencies of cytokine<sup>+</sup> clusters among cytokine<sup>+</sup> CD4<sup>+</sup> **(B)** and CD8<sup>+</sup> **(C)** T cells in UD. (\*p < 0.05, \*\*p < 0.01, \*\*\*p < 0.001). **(D-E)** Global PCA analysis using the proportions of clusters in cytokine<sup>+</sup> CD4<sup>+</sup> **(D)** and CD8<sup>+</sup> **(E)** activated T cells. The percentage on the x and y axes presents the variance attributed to PC1 and PC2, respectively.

**Figure S4. CD28 co-stimulation induces expression of other co-stimulatory molecules. Related to Figure 4.** Univariate analyses of co-stimulatory marker expression in CD4<sup>+</sup> and CD8<sup>+</sup> T cells after 15h of aAPCs stimulation of purified T cells from UD participants. The stimulation conditions are indicated in each panel. **(A-B)** Representative flow cytometry plots of CD69 **(A)** or co-stimulatory molecules **(B)** expression in CD8<sup>+</sup> T cells following 15h aAPCs (aCD3:aCD28:IgG) stimulation of 1:0:4 or 1:4:0 in purified T cells. **(C-D)** Raw CD4<sup>+</sup> **(C)** or CD8<sup>+</sup> **(D)** T cells responses to SEB in total PBMCs and to aAPCs stimulation with different aCD3:aCD28 ratios in purified T cells. Uns. Unstimulated. **(E)** Percentage of residual signal in absence of CD28 costimulation in CD4<sup>+</sup> vs CD8<sup>+</sup> T cells. Wilcoxon test result is shown. **(F-G)** Representative examples of median fluorescence intensity (MFI) of each cytokine expression in CD4<sup>+</sup> and CD8<sup>+</sup> T cells when stimulated with aCD3 aAPCs (aCD3:aCD28:IgG 1:0:4) compared to aCD3+aCD28 aAPCs (aCD3:aCD28:IgG 1:4:0). In **(C-E)**, n=11. In **(C-E)**, error bars represent interquartile range.

**Figure S5. Altered Dependency of IL-2, IFN $\gamma$ , and TNF $\alpha$  on CD28 co-stimulation in HIV infection. Related to Figure 6.** Univariate analyses of cytokine expression in CD4<sup>+</sup> and CD8<sup>+</sup> T cells after 15h of aAPCs stimulation of purified T cells from UD versus UNT participants. Unless, specified, the ratios presented are 1:4:0 (aCD3:aCD28:IgG; aCD3 aCD28 aAPCs). **(A)** Representative flow cytometry plots of cytokine expression in CD4<sup>+</sup> and CD8<sup>+</sup> T cells following 15h aAPCs (aCD3:aCD28:IgG 1:4:0) stimulation in purified T cells from UNT PWH. Unstimulated conditions represent T cells incubated with control IgG aAPCs (aCD3:aCD28:IgG 0:0:5). **(B)** Net cytokine<sup>+</sup> CD4<sup>+</sup> and CD8<sup>+</sup> T cells responses to aCD3 aAPCs (aCD3:aCD28:IgG 1:0:4) stimulation of purified T cells from UD vs UNT. **(C)** Net cytokine<sup>+</sup> CD4<sup>+</sup> and CD8<sup>+</sup> T cells responses to aAPCs (aCD3:aCD28:IgG 1:4:0) stimulation of purified T cells from UD vs UNT. **(D)** Number of net cytokine<sup>+</sup> CD4 T cells per mm<sup>3</sup> after aAPCs (aCD3:aCD28:IgG 1:0:4) or (aCD3:aCD28:IgG 1:4:0) stimulation of purified T cells from UD vs UNT. **(E)** Number of net cytokine<sup>+</sup> CD8 T cells per mm<sup>3</sup> after aAPCs (aCD3:aCD28:IgG 1:0:4) or (aCD3:aCD28:IgG 1:4:0) stimulation of purified T cells from UD vs UNT. **(F-I)** Proportions of memory subsets in CD4<sup>+</sup> (**F and H**) or CD8<sup>+</sup> (**G and I**) T cells from UD or UNT cohorts. **(J-K)** Comparison of residual signal in the absence of CD28 co-stimulation in each memory subset of CD4<sup>+</sup> (**H**) or CD8<sup>+</sup> (**I**) T cells between UD and UNT for each individual cytokine. In **(B-E, H,I)**, Mann-Whitney test results are shown. In **(B-I)**, N=12. In **(B-E, H,I)**, error bars represent interquartile range.

**Figure S6. T cells from untreated PWH exhibit imbalanced effector functions favoring IFN $\gamma$ , TNF $\alpha$ , and CD107a, with reduced IL-2 production. Related to Figure 6.** Multivariate analyses of cytokine expression in CD4<sup>+</sup> and CD8<sup>+</sup> T cells after 15h of aAPCs stimulation of purified T cells at the 1:4:0 (aCD3:aCD28:IgG; aCD3 aCD28 aAPCs) ratio. UD and UNT participants are herein qualitatively compared. Cytokine<sup>+</sup> CD4 and CD8 cells are identified by Boolean ORgate gating, downsampled to 1000 cells per participant per condition, concatenated, then analyzed as follows. **(A-B)** Net CD4<sup>+</sup> **(A)** or CD8<sup>+</sup> **(B)** T cell cytokine responses to aAPCs stimulation (aCD3:aCD28:IgG 1:4:0) of purified T cells. **(C-D)** Proportion of cytokine<sup>+</sup> cells in activated CD4<sup>+</sup> **(C)** or CD8<sup>+</sup> **(D)** T cells. In **(A-D)**, Mann-Whitney test results are shown, UD=12, UNT=13. In **(A-D)**, error bars represent interquartile range.

**Figure S7. Partial normalization of cytokine profile in CD4<sup>+</sup> T cells by ART, with limited effects on CD8<sup>+</sup> T cell functions. Related to Figure 7.** Univariate analyses of cytokine expression in CD4<sup>+</sup> and CD8<sup>+</sup> T cells after 15h of aAPCs stimulation of purified T cells from UNT versus ART participants. **(A)** Representative flow cytometry plots of cytokines expression in CD4<sup>+</sup> and CD8<sup>+</sup> T cells following 15h aAPCs (aCD3:aCD28:IgG 1:4:0) stimulation of purified T cells from ART PWH. Unstimulated conditions correspond to T cells incubated with control IgG aAPCs (aCD3:aCD28:IgG 0:0:5). **(B-C)** Net CD4<sup>+</sup> **(B)** or CD8<sup>+</sup> **(C)** T cells responses to aAPCs stimulation of purified T cells with different aCD3:aCD28 ratios. Friedman test was used. **(D)** Number of net cytokine+ CD4<sup>+</sup> T cells per mm<sup>3</sup> after aAPCs (aCD3:aCD28:IgG 1:0:4) or (aCD3:aCD28:IgG 1:4:0) stimulation of purified T cells from UNT vs ART. **(E)** N Number of net cytokine+ CD8<sup>+</sup> T cells per mm<sup>3</sup> after aAPCs (aCD3:aCD28:IgG 1:0:4) or (aCD3:aCD28:IgG 1:4:0) stimulation of purified T cells from UNT vs ART. Wilcoxon test result is shown. **(F-G)** Proportion of CD28-expressing cells in memory subsets. **(F)** CD4 (orange) and CD8 (blue) in UNT, **(G)** CD4 (orange) and CD8 (blue) in ART. **(H-I)** Median fluorescence intensity of CD28 expression on CD28<sup>+</sup> naïve and indicated memory subsets in **(H)** CD4 (orange) and CD8 (blue) in UNT, **(I)** CD4 (orange) and CD8 (blue) in ART. In **(B-M)**, UNT=13, ART=13. In **(F-I)**, Freeman tests are shown.

**Supplementary Tables**

**Table S1.** Clinical data for uninfected (UD), untreated (UNT), and treated (ART) participants. Related to Figures 1 to 7

|            | Participant ID | Sex       | Age (years) | CD4/CD8 Ratio | CD4 count (cells/uL) | Viral Load (copies/mL) | Time of infection (years) | Time on ART (years) | Time between pre-post ART timepoints (years) |
|------------|----------------|-----------|-------------|---------------|----------------------|------------------------|---------------------------|---------------------|----------------------------------------------|
| <b>UD</b>  | UD1            | M         | 64          | 1.78          | 552                  | NA                     | NA                        | NA                  | NA                                           |
|            | UD2            | M         | 59          | 2.40          | 530                  | NA                     | NA                        | NA                  | NA                                           |
|            | UD3            | M         | 40          | 1.26          | 461                  | NA                     | NA                        | NA                  | NA                                           |
|            | UD4            | F         | 41          | 3.93          | 1273                 | NA                     | NA                        | NA                  | NA                                           |
|            | UD5            | F         | 45          | 2.31          | 632                  | NA                     | NA                        | NA                  | NA                                           |
|            | UD6            | F         | 38          | 1.65          | 529                  | NA                     | NA                        | NA                  | NA                                           |
|            | UD7            | M         | 63          | 3.50          | 675                  | NA                     | NA                        | NA                  | NA                                           |
|            | UD8            | M         | 65          | 2.61          | 310                  | NA                     | NA                        | NA                  | NA                                           |
|            | UD9            | F         | 39          | 2.05          | 667                  | NA                     | NA                        | NA                  | NA                                           |
|            | UD10           | F         | 60          | 1.46          | 670                  | NA                     | NA                        | NA                  | NA                                           |
|            | UD11           | M         | 57          | 1.95          | 726                  | NA                     | NA                        | NA                  | NA                                           |
|            | UD12           | M         | 50          | 4.13          | 1758                 | NA                     | NA                        | NA                  | NA                                           |
|            | <b>MEDIAN</b>  | <b>NA</b> | <b>54</b>   | <b>2.18</b>   | <b>650</b>           | <b>NA</b>              | <b>NA</b>                 | <b>NA</b>           | <b>NA</b>                                    |
| <b>UNT</b> | UNT1           | M         | 40          | 0.75          | 571                  | 6678                   | 0.2                       | NA                  | NA                                           |
|            | UNT2           | M         | 38          | 0.23          | 320                  | 132886                 | 0.4                       | NA                  | NA                                           |
|            | UNT3           | M         | 51          | 0.12          | 216                  | 96873                  | 13.4                      | NA                  | NA                                           |
|            | UNT4           | M         | 42          | 0.45          | 320                  | 105130                 | 23.8                      | NA                  | NA                                           |
|            | UNT5           | M         | 34          | 0.07          | 300                  | 1000000                | 1.1                       | NA                  | NA                                           |
|            | UNT6           | F         | 37          | 0.59          | 321                  | 36715                  | 0.2                       | NA                  | NA                                           |
|            | UNT7           | M         | 47          | 0.96          | 492                  | 39489                  | 8.5                       | NA                  | NA                                           |
|            | UNT8           | M         | 22          | 0.31          | 597                  | 35859                  | 0.1                       | NA                  | NA                                           |
|            | UNT9           | M         | 26          | 1.11          | 597                  | 2700                   | 5.6                       | NA                  | NA                                           |
|            | UNT10          | M         | 38          | 1.63          | 962                  | 7000                   | 0.1                       | NA                  | NA                                           |
|            | UNT11          | M         | 24          | 0.80          | 971                  | 16316                  | 0.1                       | NA                  | NA                                           |
|            | UNT12          | M         | 48          | 0.35          | 416                  | 15250                  | 6.5                       | NA                  | NA                                           |
|            | UNT13          | M         | 38          | 0.89          | 1036                 | 5362                   | 0.4                       | NA                  | NA                                           |
|            | <b>MEDIAN</b>  | <b>NA</b> | <b>38</b>   | <b>0.59</b>   | <b>492</b>           | <b>35859</b>           | <b>0.45</b>               | <b>NA</b>           | <b>NA</b>                                    |
| <b>ART</b> | ART1           | M         | 42          | 1.8           | 602                  | < 20                   | 2.7                       | 2.2                 | 2.45                                         |
|            | ART2           | M         | 40          | 0.49          | 616                  | < 40                   | 1.8                       | 1.2                 | 1.44                                         |
|            | ART3           | M         | 52          | 0.30          | 361                  | < 20                   | 14.5                      | 1.1                 | 1.17                                         |
|            | ART4           | M         | 43          | 0.61          | 482                  | < 40                   | 24.9                      | 1.0                 | 1.13                                         |
|            | ART5           | M         | 37          | 0.29          | 662                  | < 40                   | 4.2                       | 2.6                 | 3.10                                         |
|            | ART6           | F         | 37          | 0.99          | 416                  | 44                     | 0.9                       | 0.5                 | 0.61                                         |
|            | ART7           | M         | 48          | 1.72          | 640                  | < 40                   | 9.8                       | 0.7                 | 1.27                                         |
|            | ART8           | M         | 26          | 1.34          | 871                  | < 40                   | 3.9                       | 3.6                 | 3.74                                         |
|            | ART9           | M         | 28          | 1.19          | 694                  | < 40                   | 7.4                       | 1.1                 | 1.82                                         |
|            | ART10          | M         | 42          | 2.30          | 509                  | < 40                   | 3.3                       | 3.1                 | 3.18                                         |
|            | ART11          | M         | 26          | 1.65          | 862                  | < 40                   | 1.8                       | 1.3                 | 1.67                                         |
|            | ART12          | M         | 50          | 0.80          | 700                  | < 40                   | 9.2                       | 1.2                 | 2.68                                         |
|            | ART13          | M         | 42          | 1.34          | 876                  | < 40                   | 4.7                       | 3.5                 | 4.23                                         |
|            | <b>MEDIAN</b>  | <b>NA</b> | <b>42</b>   | <b>1.19</b>   | <b>640</b>           | <b>NA</b>              | <b>4.24</b>               | <b>1.25</b>         | <b>1.82</b>                                  |

NA : Not-Applicable



**Table S2.** Flow cytometry antibody staining panel for intracellular detection. Related to the STAR Methods section.

| Marker                         | Fluorophore  | Clone     | Vendor                      | Catalogue # |
|--------------------------------|--------------|-----------|-----------------------------|-------------|
| CD3                            | BUV395       | UCHT1     | BD Bioscience               | 563546      |
| CD4                            | BUV496       | SK3       | BD Bioscience               | 564651      |
| CD45RA                         | BUV563       | HI100     | BD Bioscience               | 612926      |
| CD27                           | BUV661       | L128      | BD Bioscience               | 750167      |
| CD57                           | BV421        | NK-1      | BD Bioscience               | 563896      |
| CD14                           | BV480        | M5E2      | BD Bioscience               | 746304      |
| CD19                           | BV480        | HIB19     | BD Bioscience               | 746457      |
| LIVE/DEAD<br>Fixable dead cell | Aquavid      | NA        | Thermo Fisher<br>Scientific | L34960      |
| CD8                            | BV570        | RPA-T8    | Biolegend                   | 301037      |
| CD107a                         | BV786        | H4A3      | BD Bioscience               | 563869      |
| TNF $\alpha$                   | AF488        | Mab11     | Biolegend                   | 502915      |
| CD69                           | PerCPeF710   | FN50      | ebioscience                 | 46-0699-42  |
| IL17a                          | PE           | REA1063   | Miltenyi                    | 130-120-551 |
| IL-2                           | PE-Dazzle594 | MQ1-17H12 | Biolegend                   | 500344      |
| IFN $\gamma$                   | PE-Cy7       | 557643    | BD Bioscience               | 557643      |
| CCR7                           | APC-R700     | 2-L1-A    | BD Bioscience               | 566767      |
| CD40L                          | APC          | TRAP1     | BD Bioscience               | 555702      |

**Table S3.** Flow cytometry antibody staining panel for co-stimulatory molecules detection. Related to the STAR Methods section.

| Marker                         | Fluorophore  | Clone  | Vendor                      | Catalogue # |
|--------------------------------|--------------|--------|-----------------------------|-------------|
| CD3                            | BUV395       | UCHT1  | BD Bioscience               | 563546      |
| CD4                            | BUV496       | SK3    | BD Bioscience               | 564651      |
| CD45RA                         | BUV563       | HI100  | BD Bioscience               | 612926      |
| CD27                           | BUV661       | L128   | BD Bioscience               | 750167      |
| CD57                           | BV421        | NK-1   | BD Bioscience               | 563896      |
| CD14                           | BV480        | M5E2   | BD Bioscience               | 746304      |
| CD19                           | BV480        | HIB19  | BD Bioscience               | 746457      |
| LIVE/DEAD<br>Fixable dead cell | Aquavid      | NA     | Thermo Fisher<br>Scientific | L34960      |
| CD8                            | BV570        | RPA-T8 | Biolegend                   | 301037      |
| CD28                           | BUV737       | CD28.2 | BD Bioscience               | 564438      |
| PD-1                           | BB515        | EH12.1 | BD Bioscience               | 564494      |
| CD69                           | BV650        | FN50   | Biolegend                   | 310934      |
| TIGIT                          | PerCPeF710   | MBSA43 | ebioscience                 | 46-9500-42  |
| 4-1BB                          | PE-Dazzle594 | 4B4-1  | Biolegend                   | 309826      |
| ICOS                           | PE-Cy7       | ISA-3  | ebioscience                 | 25-9948     |
| CCR7                           | APC-R700     | 2-L1-A | BD Bioscience               | 566767      |
| OX40                           | APC          | ACT35  | BD Bioscience               | 563473      |
| CD40L                          | PE           | TRAP   | BD Bioscience               | 555700      |
